# Supplementary material for: Binary split fluorescent biosensor based on lettuce DNA aptamer for label-free and enzyme-free analysis of hepatitis B viral DNA
Source: Royal Society of Chemistry journal article supplement (doi:10.1039/d4ay00713a), 2024-01-01
Supplement: d4ay00713a1.pdf [file d4ay00713a1.pdf]

## Supporting Information

### **Binary split fluorescent aptasensor based on Lettuce DNA aptamer for label-free and enzyme-free analysis of Hepatitis B viral DNA**

Yanfei Zhang<sup>a</sup>, Yue Mou<sup>a</sup>, Meiyun Chen<sup>a</sup>, Xinru Lin<sup>a</sup>, Yujie Zhao<sup>b\*</sup>, Xingyu Luo<sup>a\*</sup>

<sup>a</sup>Guangxi Key Laboratory of Electrochemical Energy Materials, School of Chemistry and Chemical Engineering, Guangxi University, Nanning 530004, P.R. China.

<sup>b</sup>Medical College, Guangxi University, Nanning 530004, P.R. China.

\*Corresponding authors:

jamesluoxingyu@163.com (Xingyu Luo)

zhaoyujiehnu@163.com (Yujie Zhao)

---

## Content

|                                              |           |
|----------------------------------------------|-----------|
| <b>Experimental Section .....</b>            | <b>3</b>  |
| <b>Supplemental Tables and Figures .....</b> | <b>4</b>  |
| <b>Table S1 .....</b>                        | <b>4</b>  |
| <b>Table S2 .....</b>                        | <b>6</b>  |
| <b>Scheme S1 .....</b>                       | <b>7</b>  |
| <b>Figure S1.....</b>                        | <b>7</b>  |
| <b>Figure S2.....</b>                        | <b>8</b>  |
| <b>Figure S3.....</b>                        | <b>8</b>  |
| <b>Figure S4.....</b>                        | <b>9</b>  |
| <b>Figure S5.....</b>                        | <b>9</b>  |
| <b>References.....</b>                       | <b>10</b> |

---

## **1. Experimental Section**

### **1.1 Determination of the selectivity and competition in bsFDA**

sLet-1 and sLet-2 were both added with different types DNA oligomer were incubated in reaction buffer (1×, 20 mM Hepes, 5 mM KCl and 8 mM MgCl<sub>2</sub>, pH 6.5) for 1.5 h at 37 °C, and then 2 μM DFHO were added into a final volume of 200 μL. To test the G4 ligand competition, bsFDA was mixed with different concentrations of TMPyP4 in reaction buffer solution. The fluorescence intensity values at 520-700 nm were collected using an RF-5301PC fluorescence spectrophotometer, and the slit width of excitation was kept at 10 nm and the slit width of emission was kept at 5 nm using a 2 mm×10 mm quartz cuvette. The excitation was performed at 510 nm and the fluorescence signal at 558 nm was recorded.

### **1.2 Spacer optimization assay**

sLet-1 and sLet-2 with different spacer ranging from A<sub>0</sub> to A<sub>2</sub> were severally incubated in reaction buffer (1×, 20 mM Hepes, 5 mM KCl and 8 mM MgCl<sub>2</sub>, pH 6.5) for 1.5 h at 37 °C, and then 2 μM DFHO were added into a final volume of 200 μL. The fluorescence intensity values at 520-700 nm were collected using an RF-5301PC.

### **1.3 Experimental condition optimization**

Different incubation time (0.5, 1.0, 1.5, 2.0, 2.5, and 3.0 h) were adopted for bsFDA incubation, and then the fluorescence of each group was detected using an F-2710 fluorescence spectrophotometer with an excitation wavelength of 510 nm. After obtaining the optimal incubation time, the same procedure was followed to optimize the concentrations of Mg<sup>2+</sup> (1, 3, 5, 7, and 10 mM) and the reaction buffer pH values (6.0, 6.5, 7.0, 7.5, 8.0).

## 2. Supplemental Tables and Figures

**Table S1.** Sequences and secondary structures of DNA oligomers applied in this study\*.

| Oligonucleotide | Sequence (5' - 3')                                            | Structure type |
|-----------------|---------------------------------------------------------------|----------------|
|                 | CTTAGTAGGGATGATGCGGCAGTGGGC                                   |                |
| Lettuce         | TTCATCTATA                                                    | Single strand  |
|                 | TAAGATGAGGGGACTAAG                                            |                |
| HDs             | GTC TGT GCC TTC TCA TCT GC                                    | Single strand  |
| sLet-1          | CTT AGT AGG GAT GAT GCG GCA GTG<br>GGC TTC ATC TAG CAC AGA C  | Single strand  |
| sLet-2          | GCA GAT GAG AAG AGA TGA GGG GAC<br>TAA G                      | Single strand  |
| msLet-1         | CTT AGT ATT GAT GAT GCG GCA GTT<br>ATC TTC ATC TAG CAC AGA C  | Single strand  |
| msLet-2         | GCA GAT GAG AAG AGA TGA TAT GAC<br>TAA G                      | Single strand  |
| sLet-1/A0       | CTT AGT AGG GAT GAT GCG GCA GTG<br>GGC TTC ATC TG CAC AGA C   | Single strand  |
| sLet-1/A1       | CTT AGT AGG GAT GAT GCG GCA GTG<br>GGC TTC ATC TAG CAC AGA C  | Single strand  |
| sLet-1/A2       | CTT AGT AGG GAT GAT GCG GCA GTG<br>GGC TTC ATC TAAG CAC AGA C | Single strand  |
| sLet-2/A0       | GCA GAT GAG AAG AGA TGA GGG GAC<br>TAA G                      | Single strand  |
| sLet-2/A1       | GCA GAT GAG AAG A AGA TGA GGG<br>GAC TAA G                    | Single strand  |
| sLet-2/A2       | GCA GAT GAG AAG AA AGA TGA GGG<br>GAC TAA G                   | Single strand  |

---

|           |                                                               |               |
|-----------|---------------------------------------------------------------|---------------|
| sLet-1/T0 | CTT AGT AGG GAT GAT GCG GCA GTG<br>GGC TTC ATC TG CAC AGA C   | Single strand |
| sLet-1/T1 | CTT AGT AGG GAT GAT GCG GCA GTG<br>GGC TTC ATC TTG CAC AGA C  | Single strand |
| sLet-1/T2 | CTT AGT AGG GAT GAT GCG GCA GTG<br>GGC TTC ATC TTTG CAC AGA C | Single strand |
| sLet-2/T0 | GCA GAT GAG AAG AGA TGA GGG GAC<br>TAA G                      | Single strand |
| sLet-2/T1 | GCA GAT GAG AAG T AGA TGA GGG<br>GAC TAA G                    | Single strand |
| sLet-2/T2 | GCA GAT GAG AAG TT AGA TGA GGG<br>GAC TAA G                   | Single strand |
| ssDNA1    | CCAGTTCGTAGTAACCC                                             | Single strand |
| ssDNA2    | GGGTACTACGAACTGG                                              | Single strand |
| ds26      | CAATCGGATCGAATTCGATCCGATTG                                    | Duplex        |
| HP1       | GGGTGGGTGGACTCAGCATTGCCCAAG<br>AAGATGGGCAATGGTGGGT            | Hairpin       |
| HP2       | GGGTGGGTGGTGGGCAATGCTGAGTCA<br>TTGCCATCTTCTGTGGGT             | Hairpin       |
| Hras      | TCGGGTTGCGGGCGCAGGGCACGGGCG                                   | G-quadruplex  |
| Kras      | AGGGCGGTGTGGGAAGAGGGGAAGAGG<br>GGGAGG                         | G-quadruplex  |
| H-Telo    | GGGTTAGGGTTAGGGTTAGGG                                         | G-quadruplex  |
| Chlas     | GGGTTTTAGGGTTTTAGGGTTTAGGG                                    | G-quadruplex  |
| c-Kit2    | CCCGGGCGGGCGCGAGGGAGGGGAGG                                    | G-quadruplex  |
| Hum21     | GGGTTAGGGTTAGGGTTAGGG                                         | G-quadruplex  |
| G3T3      | GGGTTTGGGTTTGGGTTTGGG                                         | G-quadruplex  |
| Oxy       | GGGGTTTTGGGG                                                  | G-quadruplex  |

---

|         |                          |               |
|---------|--------------------------|---------------|
| PS2M    | GTGGGTAGGGCGGGTTGG       | G-quadruplex  |
| T3TT    | GGGTTTGGGTGGGTGGG        | G-quadruplex  |
| SG4     | GGGTGGGTAGGGTGGG         | G-quadruplex  |
| VEGF    | GGGAGGGTTGGGGTGGG        | G-quadruplex  |
| T95     | GGGTGGGTGGGTGGGT         | G-quadruplex  |
| HT      | TTGGGTTAGGGTTAGGGTTAGGGA | G-quadruplex  |
| HDs-M1  | GTTTGTGCCTTCTCATCTGC     | Single strand |
| HDs-M2  | ATCTGTGCCTTCTCATCTGC     | Single strand |
| HDs-M3  | GTCTGCGCCTTCTCATCTGC     | Single strand |
| HDs-M4  | GTCTGTGGCTTCTCATCTGC     | Single strand |
| HDs-M5  | GTCTGTGCGTTCTCATCTGC     | Single strand |
| HDs-M6  | GTCTGTGCCTTATCATCTGC     | Single strand |
| HDs-M7  | GTCTGTGCCTTCTCACCTGC     | Single strand |
| HDs-M8  | GTCTGTGCCTTCTCATCTGT     | Single strand |
| HDs-M9  | GGCTGTGCCTTCTCATCTGA     | Single strand |
| HDs-M10 | GTCTGTGTGTTCTCATCTGC     | Single strand |
| HDs-M11 | GTCTGTGACTTCTCATCTGA     | Single strand |
| HDs-M12 | GTCTGGGCCTTCTCATCCGC     | Single strand |
| HDs-M13 | GTCTGTGCCTTCGAATCTGC     | Single strand |
| HDs-M14 | GAGTGTGCCTTCTCATCTGC     | Single strand |
| HDs-M15 | GTCTGTGCCTTCTCATGAGC     | Single strand |

---

\* dsDNA was obtained from the hybridization between ssDNA1 and ssDNA2.

**Table S2.** Detection performance of previously reported methods.

| Detection method                                              | Linear Range     | LOD           | Methods             | Reference        |
|---------------------------------------------------------------|------------------|---------------|---------------------|------------------|
| G-quadruplex-hemin DNAzyme method                             | 0.5-100 nM       | 0.2 nM        | Colorimetry         | [1]              |
| DNA walker and CHA signal amplification fluorescent probe     | 0.5-50 nM        | 0.2 nM        | Fluorescence        | [2]              |
| Hyper-branched RCA                                            | 0.1-40 nM        | 0.05 nM       | Fluorescence        | [3]              |
| A label-free fluorescent molecular beacon based on DNA-Ag NCs | 5-200 nM         | 6.8 nM        | Fluorescence        | [4]              |
| MIP multifunctional fluorescent sensor                        | 0.5-90 nM        | 5.3 pM        | Fluorescence        | [5]              |
| Au nanoparticles on covalent Organic framework                | 0.5-10 nM        | 150 pM        | Fluorescence        | [6]              |
| <b>bsFDA</b>                                                  | <b>1-1000 nM</b> | <b>0.9 nM</b> | <b>Fluorescence</b> | <b>This work</b> |

1501: GTCTGCCGTTCCGACCGACCACGGGGCGCACCTCTCTTTACGCGGACTCCCC**GTCTGTGC**  
 1561: **CTTCTCATCTGC**CGGACCGTGTGCACTTCGCTTCACCTCTGCACGTCGCATGGAGACCAC

**Scheme S1.** Sequence alignment from +1501 to + 1620 of HBV DNA genome for obtaining the HDs sequence which marked in red<sup>[7]</sup>.

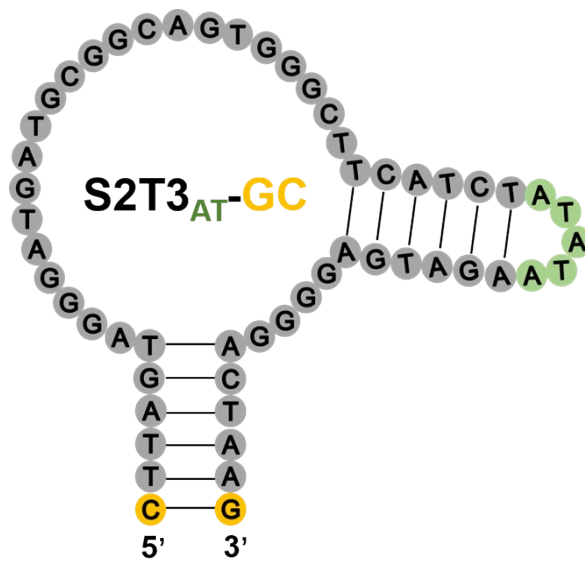

**Figure S1.** Sequence alignment and DNA structure of Lettuce aptamer.



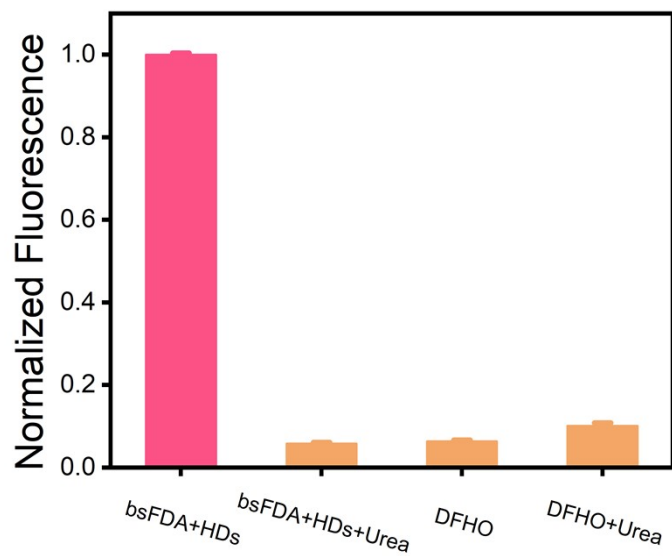

**Figure S2.** The normalized fluorescence of bsFDA/HDs and DFHO in the presence or absence 7 M urea.

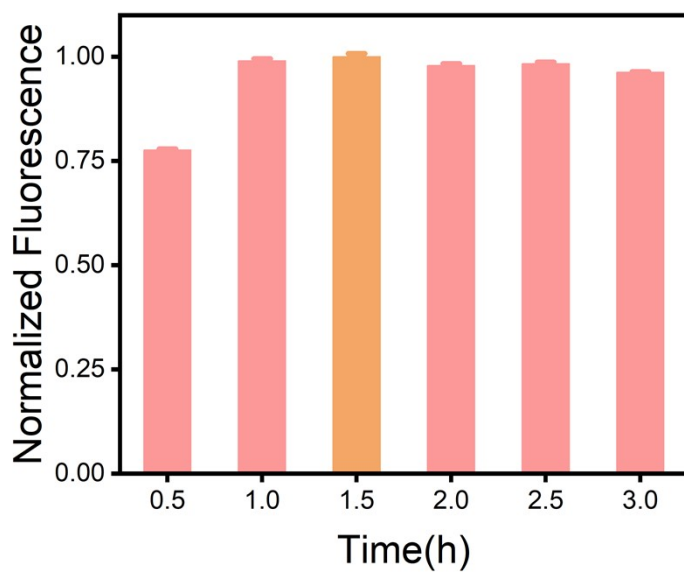

**Figure S3.** Fluorescent optimization of bsFDA for HDs recognition in different incubation time.

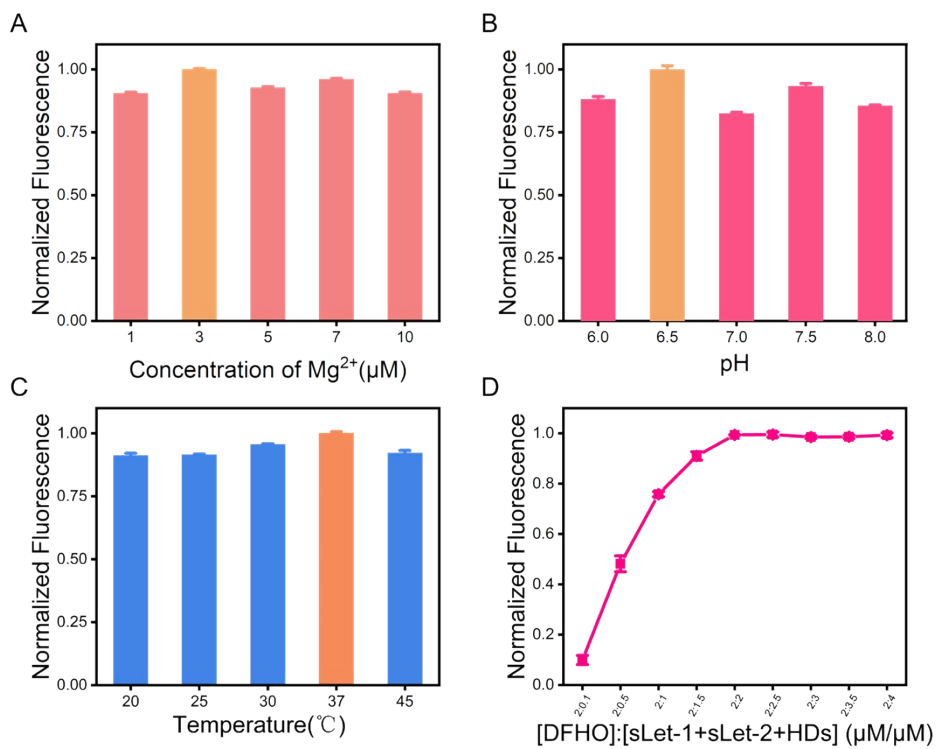

**Figure S4.** Fluorescent optimization of the concentrations of Mg<sup>2+</sup> for DNA hybridization, the pH values in reaction buffer, the incubation temperature, and the concentration ratios between DFHO and the triplex DNA structure.

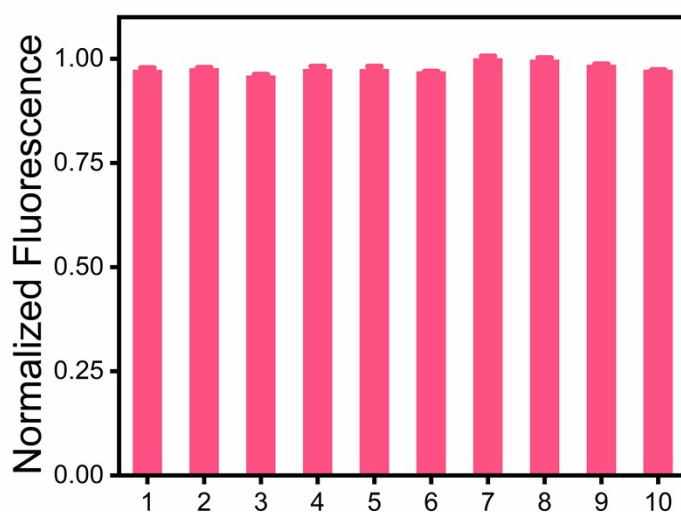

**Figure S5.** The fluorescent reproducibility of bsFDA for HDs detection in 10 times repetition.

#### 4. References

- [1] Li Y, Liu S, Deng Q, Ling L. A sensitive colorimetric DNA biosensor for specific detection of the HBV gene based on silver-coated glass slide and G-quadruplex-hemin DNAzyme. *Journal of Medical Virology*, 90, 2018, 699-705.
- [2] Feng Tao, Jie Fang, Yongcan Guo, Yiyi Tao, Xinle Han, Yuxin Hu, Jinjing Wang, Luyuan Li, Yulin Jian, Guoming Xie, A target-triggered biosensing platform for detection of HBV DNA based on DNA walker and CHA, *Analytical Biochemistry*, 554, 2018, 16-22.
- [3] Xiang-Hui Li, Xiao-Ling Zhang, Juan Wu, Ni Lin, Wei-Ming Sun, Min Chen, Qi-Shui Ou, Zhen-Yu Lin, Hyperbranched rolling circle amplification (HRCA)-based fluorescence biosensor for ultrasensitive and specific detection of single-nucleotide polymorphism genotyping associated with the therapy of chronic hepatitis B virus infection, *Talanta*, 191, 2019, 277-282.

- 
- [4] Qiao Cao, Ye Teng, Xuan Yang, Jin Wang, Erkang Wang, A label-free fluorescent molecular beacon based on DNA-Ag nanoclusters for the construction of versatile Biosensors, *Biosensors and Bioelectronics*, 74, 2015, 318-321.
- [5] Lianghai Luo, Feng Zhang, Chunyan Chen, and Changqun Cai. Visual Simultaneous Detection of Hepatitis A and B Viruses Based on a Multifunctional Molecularly Imprinted Fluorescence Sensor. *Analytical Chemistry*, 91, 2019, 15748-15756.
- [6] Y. Tian, Q. Lu, X. Guo, S. Wang, Y. Gao and L. Wang, Au nanoparticles deposited on ultrathin two-dimensional covalent organic framework nanosheets for in vitro and intracellular sensing. *Nanoscale*, 12, 2020, 7776-7781.
- [7] T. Abraham, D. Loeb, The Topology of Hepatitis B Virus Pregenomic RNA Promotes Its Replication, *Journal of Virology*, 81, 2007, 11577-11584.
